# Supplementary material for: Asymmetric Regulation of Peripheral Genes by Two Transcriptional Regulatory Networks
Source: PubMed Central journal article supplement (PMC4970704; doi:10.1371/journal.pone.0160459), 2016-08-02
Supplement: pone.0160459.s002.pdf [file pone.0160459.s002.pdf]

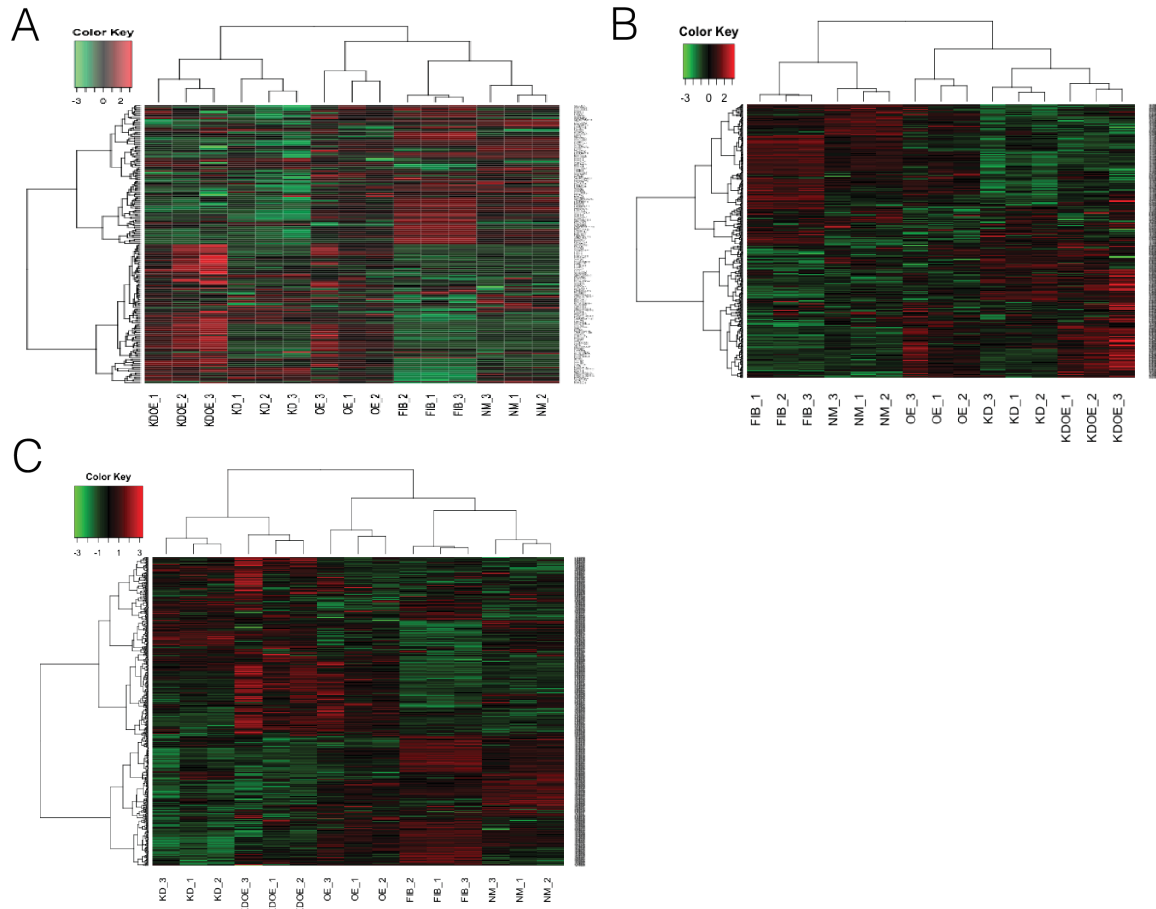

**S2 Fig. Heatmap diagram of (A) top 100 genes, (B) top 200 , and (C) top 300 monocytic and fibroblastic genes.** These results showed similar results compared with all specific genes plotted in Fig 2B.
