# Supplementary material for: Asymmetric Regulation of Peripheral Genes by Two Transcriptional Regulatory Networks
Source: PubMed Central journal article supplement (PMC4970704; doi:10.1371/journal.pone.0160459), 2016-08-02
Supplement: pone.0160459.s003.pdf [file pone.0160459.s003.pdf]

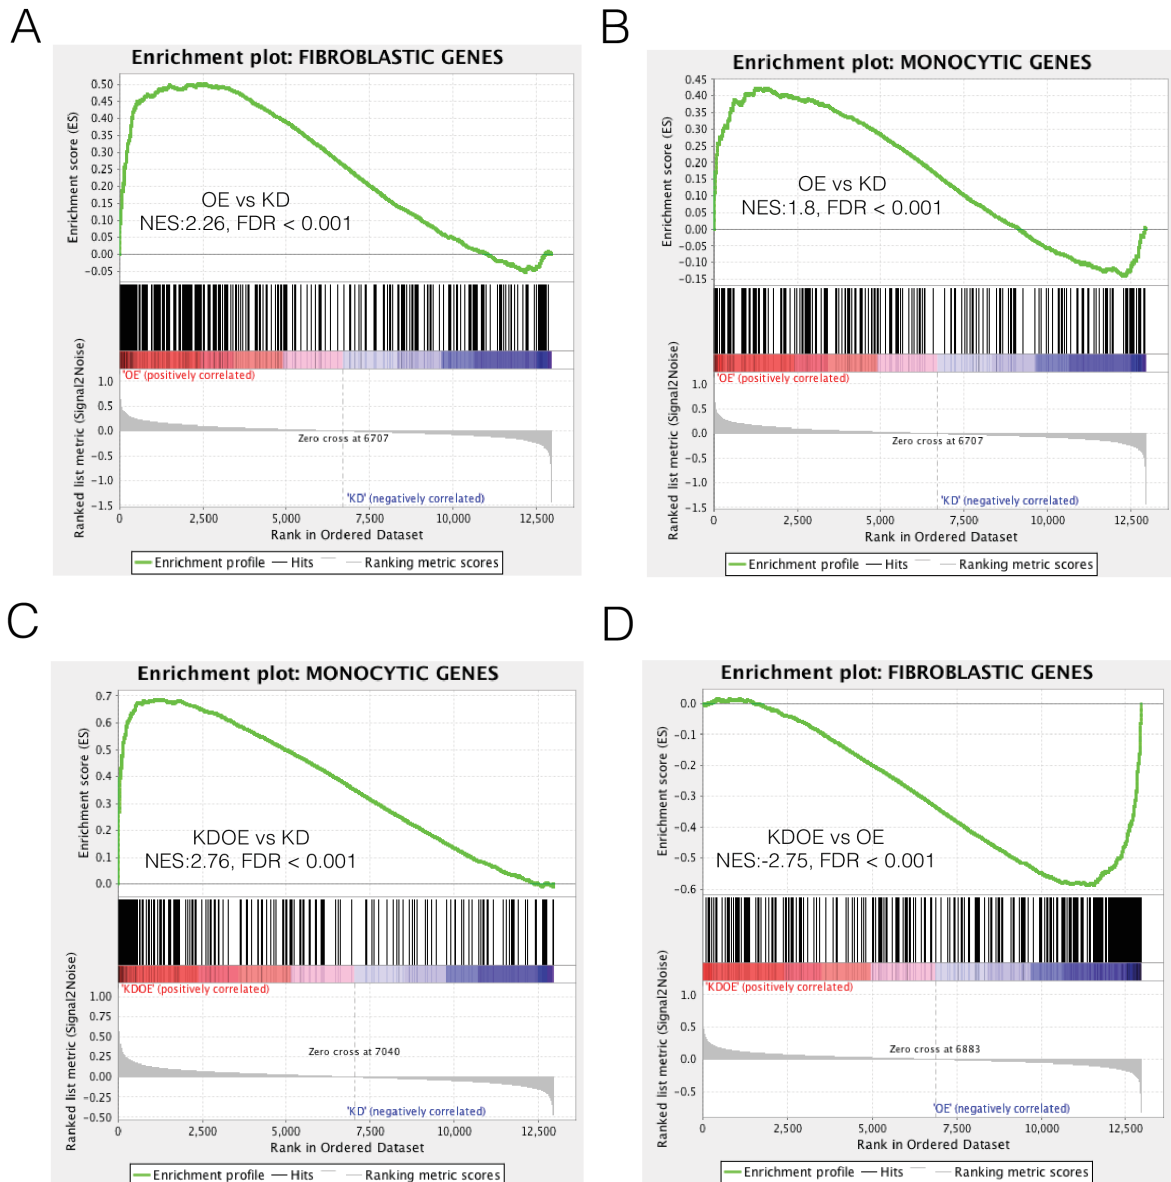

**S3 Fig. Gene set enrichment analysis of OE-only against KD-only (A-B) and KDOE against KD-only/ OE-only (C-D).** (A & B) Fibroblastic genes and monocytic genes were higher expressed in OE-only than KD-only, showing that OE-only poorly suppressed fibroblastic genes while the expressed more monocytic genes. (C) KDOE were significantly enriched in monocytic genes against KD-only. (D) Enrichment in fibroblastic genes was negative when compared to OE-only, confirming the knocking down of fibroblastic TRNW in KDOE.
