# Supplementary material for: Asymmetric Regulation of Peripheral Genes by Two Transcriptional Regulatory Networks
Source: PubMed Central journal article supplement (PMC4970704; doi:10.1371/journal.pone.0160459), 2016-08-02
Supplement: pone.0160459.s004.pdf [file pone.0160459.s004.pdf]

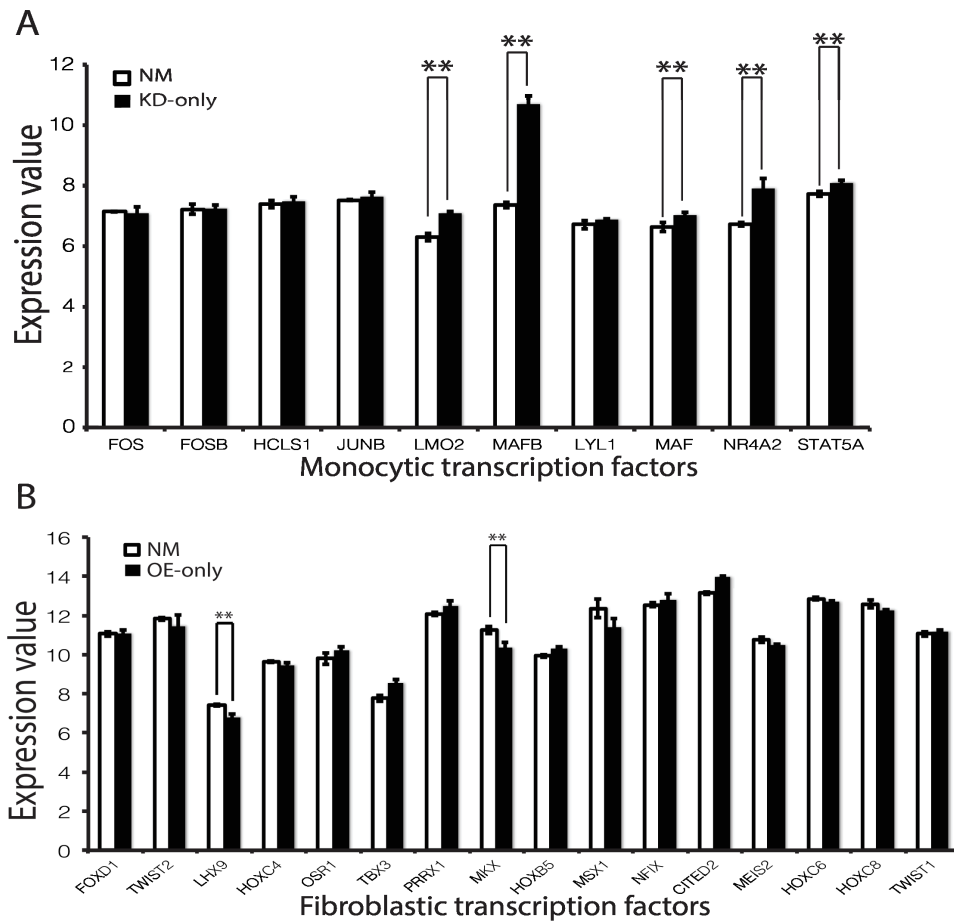

**S4 Fig. Expression levels from microarray data of other monocytic (A) and fibroblastic (B) transcription factors.** (A) Knocking down fibroblastic TRNW significantly up-regulated several monocytic TFs such as *LMO2*, *MAFB*, *MAF*, *NR4A2*, and *STAT5A* (\*\*: p -value < 0.05, t-test). (B) Overexpressing monocytic TRNW merely down-regulated significantly in *MKX*.
