# Supplementary material for: Asymmetric Regulation of Peripheral Genes by Two Transcriptional Regulatory Networks
Source: PubMed Central journal article supplement (PMC4970704; doi:10.1371/journal.pone.0160459), 2016-08-02
Supplement: pone.0160459.s005.pdf [file pone.0160459.s005.pdf]

**S1 Table. Primers sets for qPCR**

---

**(A) Fibroblastic TFs**

---

|           |                          |
|-----------|--------------------------|
| OSR1_Fw   | AAGACCACCTGCGAGACCA      |
| OSR1_Rv   | CTTGTGGACAGCGAGAGTCC     |
| PRRX1_Fw  | GAGACCCACCGATTATCTCTCC   |
| PRRX1_Rv  | CGTTATGAAGCCCCTCGTGT     |
| LHX9_Fw   | GCTTGCCCAGAAAACAGGTC     |
| LHX9_Rv   | TCCTGCCGCAAAGGTTCC       |
| TWIST2_Fw | GAGCAAGATCCAGACGCTCA     |
| TWIST2_Rv | TGGTCATCTTATTGTCCATCTCGT |

---

**(B) Monocytic TFs**

---

|          |                          |
|----------|--------------------------|
| SPI1_Fw  | CAAAGATAAGGGCACATTCCAGTT |
| SPI1_Rv  | GGTCATCTTCTTCCATTTCCCTTC |
| CEBPA_Fw | CAGCATTGACATTTCCGCTTAC   |
| CEBPA_Rv | TGCTTTTGCCTTTTCCTGCT     |
| MMDA_Fw  | GGCGTGATGGAGATAAAAGAGG   |
| MMDA_Rv  | GGTGCTTGTGTTGCGATTTCTATG |
| IRF8_Fw  | ACGGCAGGGAGTGTTTGTG      |
| IRF8_Rv  | CGTTCCAGCTTGTGTTGGGTCT   |

---

**(C) LPS stimulated genes**

---

|           |                          |
|-----------|--------------------------|
| TNF_Fw    | GCCTGCTGCACTTTGGAGT      |
| TNF_Rv    | CTCGGGGTTTCGAGAAGATG     |
| IL6_Fw    | CACCTCTTCAGAACGAATTGACA  |
| IL6_Rv    | CCTCTTTGCTGCTTTCACACA    |
| IL1B_Fw   | TTTGAAGCTGATGGCCCTAAA    |
| IL1B_Rv   | GTGGTGGTCGGAGATTTCGTAG   |
| CCL2_Fw   | CAGCAGCAAGTGTCCCAA       |
| CCL2_Rv   | ATGGAATCCTGAACCCACTTCT   |
| CXCL10_Fw | TTCCTGCAAGCCAATTTTGT     |
| CXCL10_Rv | TGATGGCCTTCGATTCTGG      |
| IFNB1_Fw  | ATCTAGCACTGGCTGGAATGAG   |
| IFNB1_Rv  | CCAGGACTGTCTTCAGATGGTTT  |
| CCL3_Fw   | CAGATTCCACAGAATTCATAGCTG |
| CCL3_Rv   | CGGCTTCGCTTGGTTAGGA      |

---
